# Supplementary material for: High-Zinc Supplementation of Weaned Piglets Affects Frequencies of Virulence and Bacteriocin Associated Genes Among Intestinal Escherichia coli Populations
Source: Front Vet Sci. 2020 Dec 16;7:614513. doi: 10.3389/fvets.2020.614513 (PMC7772137; doi:10.3389/fvets.2020.614513)
Supplement: Supplementary file 1 [file Table_1.XLSX]

## Sheet: Tabelle1
	Metadata				Phylogenetic data				Virulence-associated genes (VAGs) - Adhesins														Virulence-associated genes (VAGs) - Toxins												Colicin-B		Colicin-M		Colicin-S4			Colicin-Ia		Colicin-Ib		Microcin-V
Strain no.	Sample_ID	Original-ID	source	ZnCl2-MIC (µg/ml)	Sequence type (ST)	CC	Serotype	BAPS cluster	aidA	aah	bfpA	eae Type α	eae	faeG (F4)	fanA (F5)	fasA (F6)	fedA (F18)	fimF41a (F41)	iha	pic	paa	saa	cdt	astA/ east1	ehxA	efa1/lifA	eltA	eltB	estA	estB	set1AB	stx1AB	stx2AB	stx2eAB	cba	cbi	cma	cmi	csa	csi	csl	cia	iia	cib	iib	cvaA	cvaB	cvaC	cvi
IMT203	IMT203	Pathogens	pig	256	100		O149:H10	IV	0	0	0	0	0	1	0	1	0	0	1	0	0	0	0	1	0	0	1	1	1	1	0	0	0	0	1	1	1	1	0	0	0	0	0	0	0	0	0	0	0
RKI6199	IMT19	Pathogens	pig	256	42		O138:H14	VII	1	1	0	0	0	0	0	0	1	0	0	0	0	0	0	0	0	0	0	0	1	1	0	1	1	0	0	0	0	0	0	0	0	1	1	0	0	0	0	0	0
RKI6200	IMT20	Pathogens	pig	256	114		O139:H1	VII	1	1	0	0	0	0	0	0	1	0	0	0	0	0	0	0	0	0	0	0	0	0	0	1	0	1	0	0	0	0	0	0	0	0	0	0	0	0	0	0	0
RKI6201	IMT4632	Pathogens	pig	256	10	ST10 Cplx	O141:H4	III	0	0	0	0	0	0	0	0	1	0	0	0	0	0	0	0	0	0	0	0	0	0	0	1	1	0	0	0	0	0	0	0	0	0	0	0	0	0	0	0	0
RKI6202	IMT6655	Pathogens	pig	256	4247		O?:H45	VII	1	1	0	0	0	0	0	0	0	0	0	0	0	0	0	1	0	0	0	0	0	1	0	0	0	0	0	0	0	0	0	0	0	0	0	0	0	0	0	0	0
RKI6203	IMT8071	Pathogens	pig	256	302		O108:H9	VII	0	0	1	0	1	0	0	0	0	0	0	0	0	0	0	0	0	0	0	0	0	0	0	0	0	0	1	1	1	1	0	0	0	0	0	0	0	0	0	0	0
RKI6122	RKI6122	RS0951 (Reference)	human	1024	617	ST10 Cplx	O unknown:H10	IV	0	0	0	0	0	0	0	0	0	0	0	0	0	0	0	0	0	0	0	0	1	0	0	0	0	0	0	0	0	0	0	0	0	1	1	0	0	0	0	0	0
[truncated: 16 more columns]
